# Supplementary material for: Discovery and Characterisation of Forward Line Formations at Centre Bounces in the Australian Football League
Source: Sensors (Basel). 2023 May 19;23(10):4891. doi: 10.3390/s23104891 (PMC10222966; doi:10.3390/s23104891)
Supplement: Supplementary file 1 [file sensors-23-04891-s001.zip › sensors-2318482-supplementary.pdf]

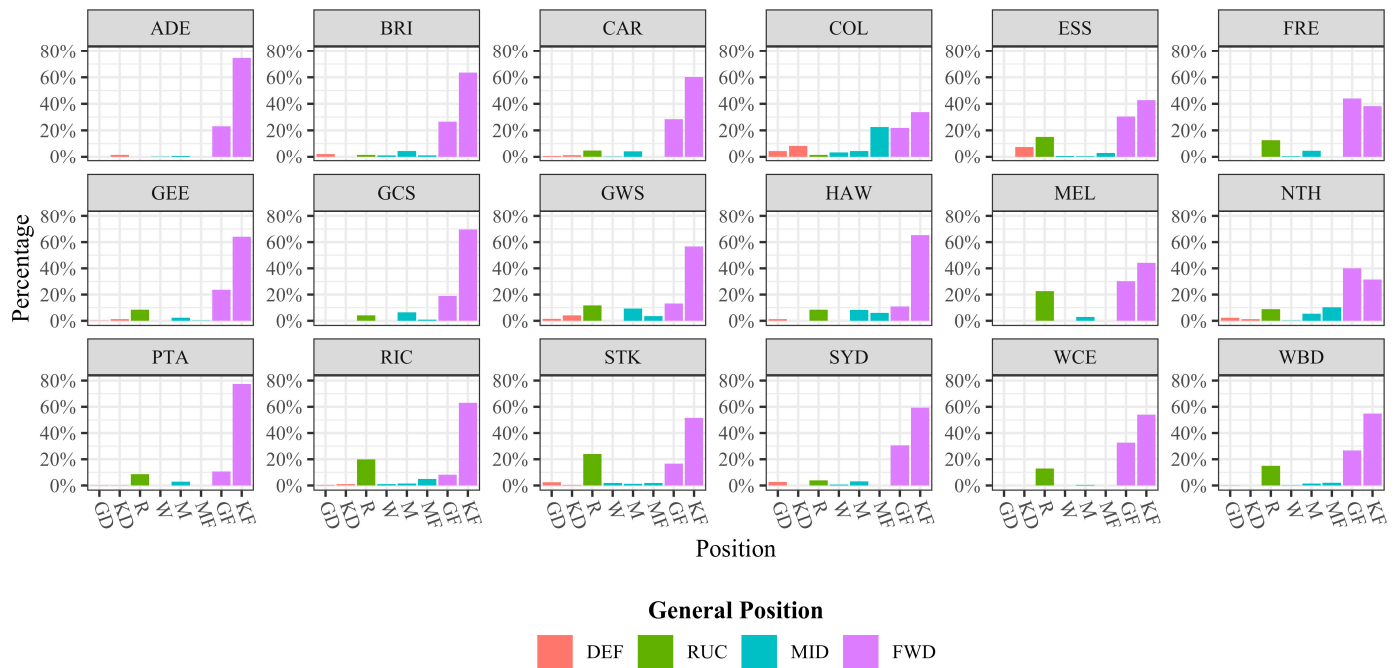

**Supplementary Figure S1.** Count of player roles used in the goal square of forward line formations by team.

**Supplementary Table S1.** AFL team names and abbreviations.

| Team                          | Abbreviation | Team              | Abbreviation |
|-------------------------------|--------------|-------------------|--------------|
| Adelaide                      | ADE          | Hawthorn          | HAW          |
| Brisbane Lions                | BRI          | Melbourne         | MEL          |
| Carlton                       | CAR          | North Melbourne   | NTH          |
| Collingwood                   | COL          | Port Adelaide     | PTA          |
| Essendon                      | ESS          | Richmond          | RIC          |
| Fremantle                     | FRE          | St Kilda          | STK          |
| Geelong                       | GEE          | Sydney Swans      | SYD          |
| Gold Coast SUNS               | GCS          | West Coast Eagles | WCE          |
| Greater Western Sydney GIANTS | GWS          | Western Bulldogs  | WBD          |

**Supplementary Table S2.** Abbreviated AF player role names and respective “zones” [55].

| Position         | Abbreviation | Description                                                                                                                                 |
|------------------|--------------|---------------------------------------------------------------------------------------------------------------------------------------------|
| General Defender | GD           | Plays on the general forward and usually sets up play and wins more of the ball than a key defender.                                        |
| Key Defender     | KD           | A tall or mid-sized defender who plays on the opposition’s key forward                                                                      |
| Wing             | W            | A player who aligns on the sides of the centre square at a centre bounces and follows the play predominantly on a single wing of the field. |
| Ruck             | R            | A player who contests at least 35% of hit-outs for their team.                                                                              |
| Midfielder       | M            | A player who predominantly starts inside the centre square at centre bounces and follows the ball all across the field.                     |
| Mid-Forward      | MF           | A player who spends at least 35% of their time as both a mid-fielder/wing or forward.                                                       |
| General Forward  | GF           | A small/medium player that predominantly plays in the forward half of the ground.                                                           |

|             |    |                                                                                                |
|-------------|----|------------------------------------------------------------------------------------------------|
| Key Forward | KF | A taller player who can take contested marks and is usually one of the focal points inside 50. |
|-------------|----|------------------------------------------------------------------------------------------------|

**Supplementary Table S3.** Centre bounce rejection rates for different venues. Centre bounces were rejected if there were not six players within 55 m of the goal, indicating player position errors above the accepted threshold.

| Venue Name                     | Total CBs | N rejected | Rejection Rate (%) |
|--------------------------------|-----------|------------|--------------------|
| Sydney Cricket Ground (SCG)    | 589       | 119        | 20.2               |
| Gabba                          | 630       | 109        | 17.3               |
| GIANTS Stadium                 | 360       | 58         | 16.11              |
| GMHBA Stadium                  | 558       | 78         | 13.98              |
| Metricon Stadium               | 653       | 72         | 11.03              |
| Marvel Stadium                 | 2405      | 232        | 9.65               |
| Adelaide Oval                  | 1184      | 109        | 9.21               |
| Melbourne Cricket Ground (MCG) | 2088      | 169        | 8.09               |
| Optus Stadium                  | 1326      | 104        | 7.84               |
| Blundstone Arena               | 296       | 21         | 7.09               |
| Cazaly's Stadium               | 40        | 2          | 5                  |
| University of Tasmania Stadium | 416       | 7          | 1.68               |
| Mars Stadium                   | 144       | 2          | 1.39               |
| Manuka Oval                    | 114       | 0          | 0                  |

**Supplementary Table S4.** Top five formations (frequent player location clustering method) per team.

| Team | Formation          | Percentage Used | Team | Formation                       | Percentage Used | Team | Formation                       | Percentage Used |
|------|--------------------|-----------------|------|---------------------------------|-----------------|------|---------------------------------|-----------------|
| ADE  | LHMDR              | 28.14%          | GEE  | LHMDR                           | 13.93%          | PTA  | LHMDR                           | 24.73%          |
|      | LHD <sub>2</sub> R | 19.32%          |      | LHD <sub>2</sub> R              | 7.82%           |      | LH <sub>2</sub> DR              | 16.18%          |
|      | LHM <sub>2</sub> R | 13.13%          |      | LH <sub>2</sub> DR              | 5.15%           |      | LHDR <sub>2</sub>               | 11.82%          |
|      | LH <sub>2</sub> MR | 4.69%           |      | LHM <sub>2</sub> R              | 4.01%           |      | LHD <sub>2</sub> R              | 8.18%           |
|      | LHMD <sub>2</sub>  | 3.19%           |      | LMD <sub>2</sub> R              | 3.44%           |      | L <sub>2</sub> HDR              | 7.27%           |
| BRI  | LH <sub>2</sub> MR | 9.38%           | GCS  | H <sub>3</sub> M <sub>2</sub>   | 6.41%           | RIC  | LH <sub>2</sub> DR              | 20.3%           |
|      | LH <sub>2</sub> DR | 8.85%           |      | H <sub>3</sub> MR               | 5.61%           |      | LH <sub>2</sub> MR              | 19.44%          |
|      | H <sub>3</sub> MR  | 7.43%           |      | LH <sub>2</sub> MR              | 5.41%           |      | LHMDR                           | 12.82%          |
|      | H <sub>2</sub> MDR | 4.96%           |      | LH <sub>2</sub> M <sub>2</sub>  | 5.01%           |      | LHM <sub>2</sub> R              | 11.75%          |
|      | LHMDR              | 4.96%           |      | H <sub>2</sub> M <sub>2</sub> R | 4.81%           |      | LHD <sub>2</sub> R              | 4.91%           |
| CAR  | LHD <sub>2</sub> R | 26.33%          | GWS  | H <sub>2</sub> M <sub>2</sub> D | 6.23%           | STK  | LHM <sub>2</sub> R              | 10.08%          |
|      | LHMDR              | 25%             |      | HM <sub>2</sub> DR              | 5.69%           |      | H <sub>2</sub> M <sub>3</sub>   | 7.86%           |
|      | LHM <sub>2</sub> R | 9.85%           |      | LHMDR                           | 4.63%           |      | H <sub>2</sub> M <sub>2</sub> D | 5.85%           |
|      | L <sub>2</sub> HDR | 4.17%           |      | HM <sub>2</sub> D <sub>2</sub>  | 4.27%           |      | LH <sub>2</sub> M <sub>2</sub>  | 5.65%           |
|      | L <sub>2</sub> HMR | 3.98%           |      | HMD <sub>2</sub> R              | 3.91%           |      | LHMDR                           | 5.24%           |
| COL  | LHM <sub>2</sub> R | 20.99%          | HAW  | LHMDR                           | 26.94%          | SYD  | LHD <sub>2</sub> R              | 29%             |
|      | LHMDR              | 11.88%          |      | LHM <sub>2</sub> R              | 15.03%          |      | LHMDR                           | 17.44%          |
|      | LM <sub>3</sub> R  | 7.52%           |      | LHD <sub>2</sub> R              | 9.67%           |      | LHM <sub>2</sub> R              | 8.36%           |
|      | LH <sub>2</sub> MR | 6.93%           |      | H <sub>2</sub> MDR              | 6.74%           |      | LH <sub>2</sub> MR              | 7.47%           |
|      | L <sub>2</sub> HMR | 4.95%           |      | LH <sub>2</sub> MD              | 5.87%           |      | LMD <sub>2</sub> R              | 3.91%           |
| ESS  | H <sub>2</sub> MDR | 10.97%          | MEL  | LHMDR                           | 40.83%          | WCE  | LHD <sub>2</sub> R              | 12.52%          |
|      | LH <sub>2</sub> MD | 8.18%           |      | LH <sub>2</sub> DR              | 18.02%          |      | LHMDR                           | 8.71%           |
|      | LHMDR              | 7.62%           |      | LH <sub>2</sub> MR              | 10.25%          |      | H <sub>2</sub> D <sub>2</sub> R | 6.72%           |
|      | HM <sub>2</sub> DR | 5.58%           |      | LHM <sub>2</sub> R              | 8.43%           |      | LHMD <sub>2</sub>               | 6.35%           |
|      | H <sub>3</sub> MD  | 5.58%           |      | LHDRS                           | 4.96%           |      | LH <sub>2</sub> MD              | 5.99%           |

|     |                    |        |     |                    |        |     |                                 |        |
|-----|--------------------|--------|-----|--------------------|--------|-----|---------------------------------|--------|
| FRE | LHD <sub>2</sub> R | 24.18% | NTH | LHD <sub>2</sub> R | 33.81% | WBD | LHD <sub>2</sub> R              | 10.85% |
|     | LHMDR              | 19.34% |     | LHMDR              | 27.94% |     | LHMDR                           | 9.77%  |
|     | LHDR <sub>2</sub>  | 6.19%  |     | LHM <sub>2</sub> R | 9.31%  |     | H <sub>2</sub> M <sub>2</sub> D | 7.91%  |
|     | L <sub>2</sub> HDR | 5.22%  |     | L <sub>2</sub> HMR | 2.63%  |     | HM <sub>2</sub> D <sub>2</sub>  | 7.6%   |
|     | LMD <sub>2</sub> R | 4.64%  |     | LHDS               | 2.43%  |     | H <sub>2</sub> MD <sub>2</sub>  | 7.13%  |
